# Supplementary material for: Porous polyimide framework based on perylene and triazine for reversible potassium-ion storage
Source: Royal Society of Chemistry journal article supplement (doi:10.1039/d1qm00843a), 2021-01-01
Supplement: d1qm00843a1.pdf [file d1qm00843a1.pdf]

## Supplementary Information

### Porous Polyimide Frameworks Based on Perylene and Triazine for Reversible Potassium Ion Storage

Jialing Wu<sup>1,2</sup>, Sijia Di<sup>2</sup>, Wei Huang<sup>2</sup>, Yunling Wu<sup>2</sup>, Qiliang Huang<sup>2</sup>, Xuan Zhao<sup>2</sup>, Xiaohan Yu<sup>2</sup>,  
Mochun Zhang<sup>2</sup>, Hualin Ye<sup>\*3</sup>, Yanguang Li<sup>\*1,2</sup>

<sup>1</sup> Macao Institute of Materials Science and Engineering, Macau University of Science and Technology, Taipa 999078, Macau SAR, China

<sup>2</sup> Institute of Functional Nano & Soft Materials (FUNSOM), Jiangsu Key Laboratory for Carbon-Based Functional Materials and Devices, Soochow University, Suzhou, 215123, China

<sup>3</sup> Department of Chemical and Biomolecular Engineering, National University of Singapore, 119260, Singapore

\*Corresponding authors:

[yanguang@suda.edu.cn](mailto:yanguang@suda.edu.cn) (Y. G. Li); [hualinye@u.nus.edu](mailto:hualinye@u.nus.edu) (H. L. Ye);

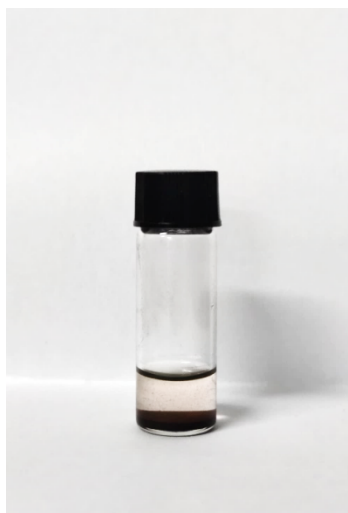

**Figure S1.** Photograph of 20 mg PIF suspended in 2 mL of blank electrolyte.

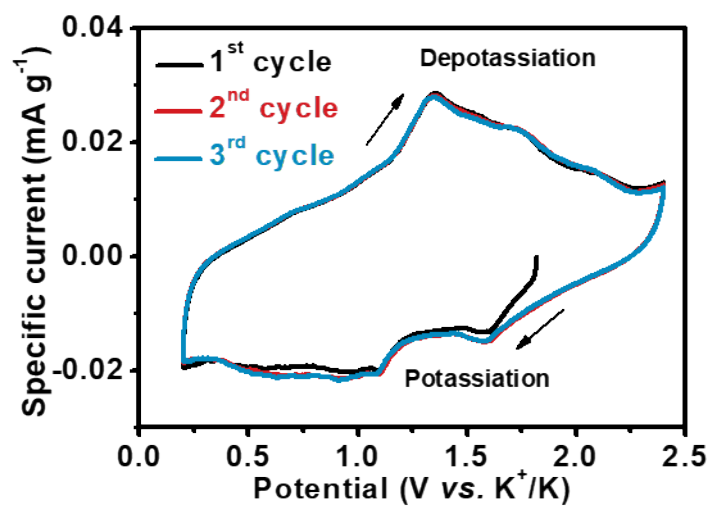

**Figure S2.** CV curves of PIF at 0.1 mV s<sup>-1</sup> for the first three cycles.

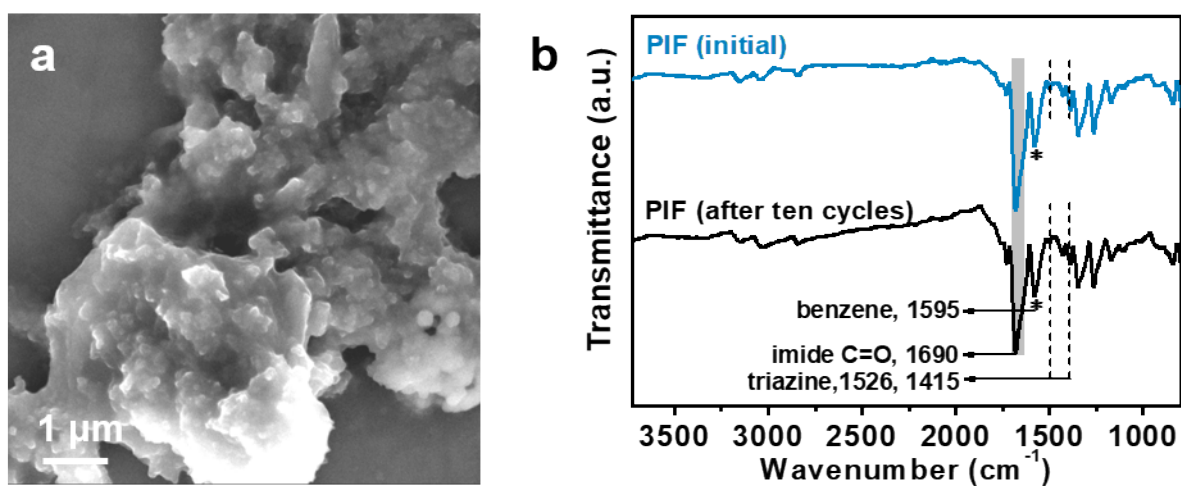

**Figure S3.** (a) SEM image of PIF recollected after cycles, its surface was covered by SEI films; (b) FT-IR spectrum of PIF before and after cycling.

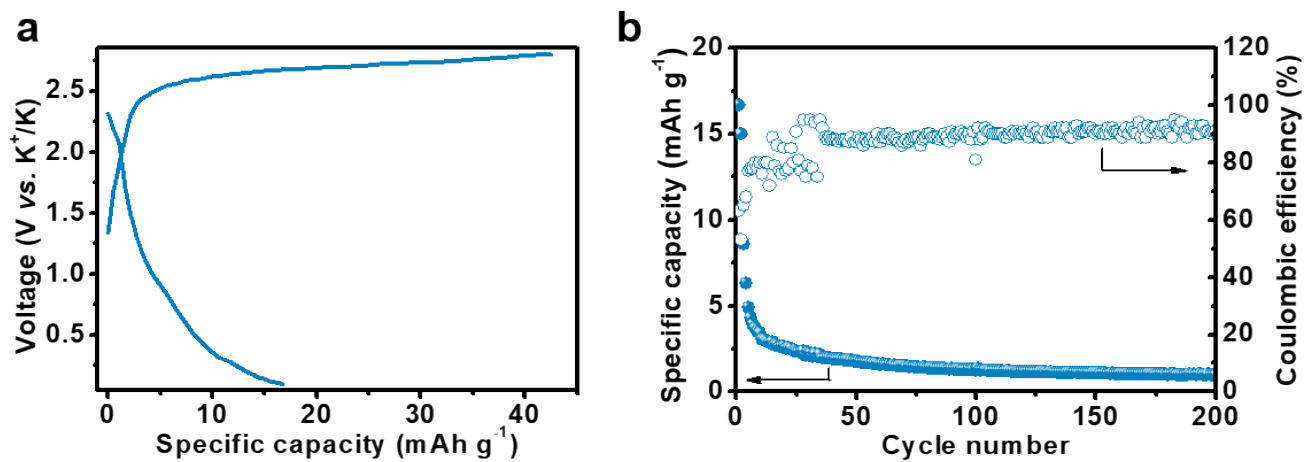

**Figure S4.** (a) Galvanostatic charge-discharge curves and (b) cycling stability of PTCDA at 0.2 A g<sup>-1</sup>.

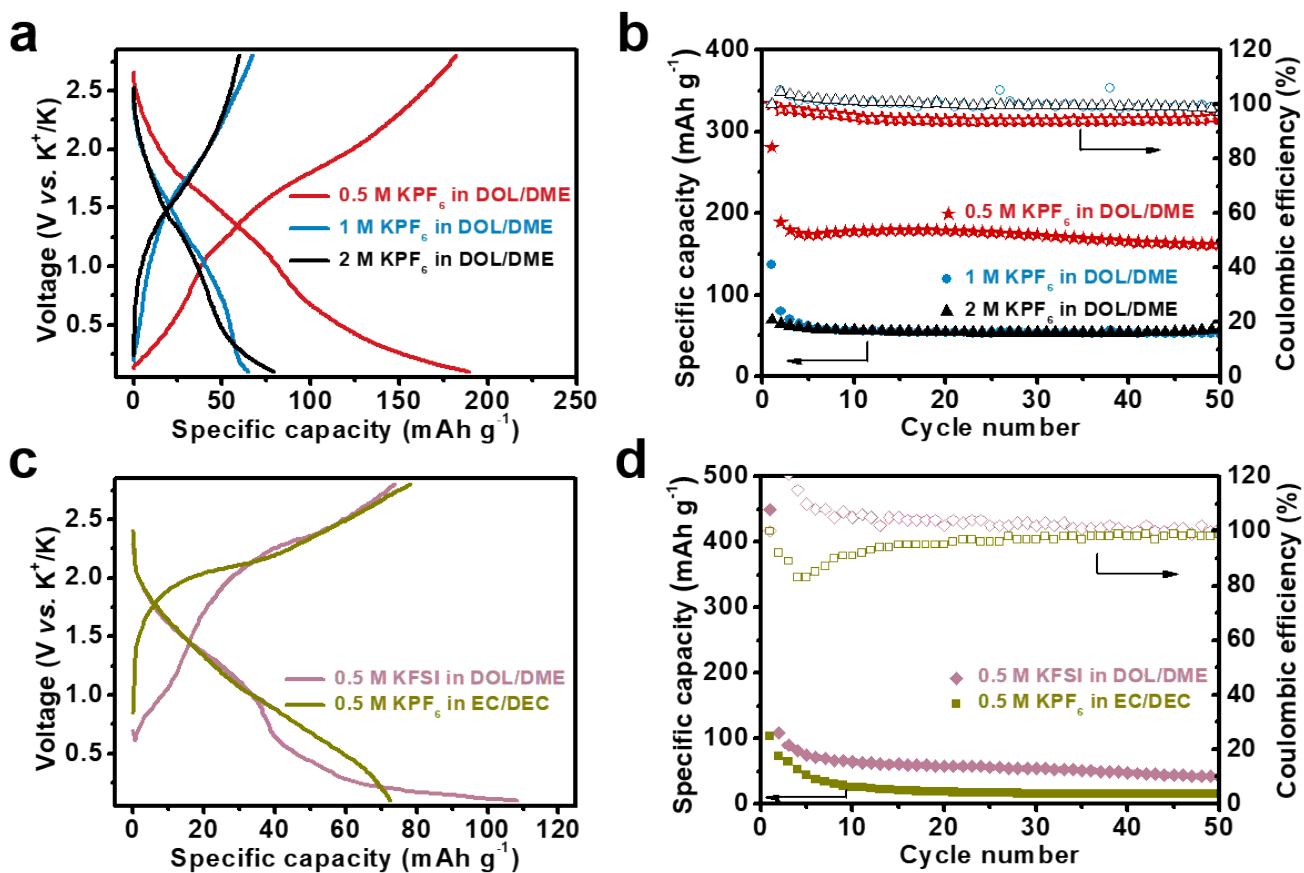

**Figure S5.** Electrochemical performances of PIF in different electrolytes. (a, c) Voltage profiles of the 2<sup>nd</sup> cycle at 0.2 A g<sup>-1</sup>; (b, d) cycling stability at 0.2 A g<sup>-1</sup>.

**Table S1.** Comparison of the electrochemical performance of our PIF with earlier literature results for KIBs.

| <b>Materials</b>   | <b>Specific capacity (mAh g<sup>-1</sup>)</b>                                                             | <b>Capacity retention (%) at specific current</b>                                                   | <b>Reference</b>                                        |
|--------------------|-----------------------------------------------------------------------------------------------------------|-----------------------------------------------------------------------------------------------------|---------------------------------------------------------|
| <b>PIF</b>         | <b>190 at 0.2 A g<sup>-1</sup></b><br><b>120 at 1 A g<sup>-1</sup></b><br><b>95 at 5 A g<sup>-1</sup></b> | <b>75% after 200 cycles at 0.2 A g<sup>-1</sup></b>                                                 | <b>This work</b>                                        |
| K <sub>2</sub> TP  | 110 at 0.22 A g <sup>-1</sup><br>79 at 0.44 A g <sup>-1</sup>                                             | 96% after 100 cycles at 0.044 A g <sup>-1</sup>                                                     | <i>Nano Energy</i> 2016, <b>33</b> , 350-355            |
| K <sub>2</sub> PC  | 94 at 0.22 A g <sup>-1</sup><br>55 at 0.44 A g <sup>-1</sup>                                              | 88% after 100 cycles at 0.044 A g <sup>-1</sup>                                                     |                                                         |
| ADAPTS             | 105 at 0.155 A g <sup>-1</sup><br>90 at 0.31 A g <sup>-1</sup>                                            | 67% after 1000 cycles at 0.155 A g <sup>-1</sup><br>57% after 1000 cycles at 0.31 A g <sup>-1</sup> | <i>Adv. Energy Mater.</i> 2019, <b>9</b> , 1802986      |
| K <sub>4</sub> PTC | 132 at 0.05 A g <sup>-1</sup><br>73 at 0.5 A g <sup>-1</sup>                                              | 73% after 500 cycles at 0.05 A g <sup>-1</sup><br>57% after 2500 cycles at 0.5 A g <sup>-1</sup>    | <i>Chem. Commun.</i> 2019, <b>55</b> , 1801-1804        |
| PyBT               | 220 at 0.2 A g <sup>-1</sup><br>104 at 0.5 A g <sup>-1</sup>                                              | 82% after 500 cycles at 0.05 A g <sup>-1</sup>                                                      | <i>ACS Nano</i> 2019, <b>13</b> , 745-754               |
| VK (Vitamin K)     | 200 at 0.01 A g <sup>-1</sup>                                                                             | 37.5% after 100 cycles at 0.1 A g <sup>-1</sup>                                                     | <i>J. Mater. Chem. A</i> 2018, <b>6</b> , 12559-12564   |
| HC-B (hard carbon) | 148 at 1 A g <sup>-1</sup>                                                                                | 49% after 1000 cycles at 1 A g <sup>-1</sup>                                                        | <i>Small</i> 2021, <b>17</b> , 2100397                  |
| Graphite           | 273 at 0.007 A g <sup>-1</sup>                                                                            | 50% after 50 cycles at 0.14 A g <sup>-1</sup>                                                       | <i>J. Am. Chem. Soc.</i> 2015, <b>137</b> , 11566-11569 |
| Soft carbon        | 210 at 0.28 A g <sup>-1</sup><br>185 at 0.14 A g <sup>-1</sup>                                            | 81.4% after 50 cycles at 0.558 A g <sup>-1</sup>                                                    |                                                         |
